# Supplementary material for: Computational insight of the mechanism of Algar–Flynn–Oyamada (AFO) reaction
Source: Royal Society of Chemistry journal article supplement (doi:10.1039/c3ra46623j), 2014-01-01
Supplement: c3ra46623j1.pdf [file c3ra46623j1.pdf]

## Supplementary Information

# Computational Insight of the Mechanism of Algar-Flynn-Oyamada (AFO) Reaction

Shubhankar Bhattacharyya<sup>†\*</sup>, Kaushik Hatua<sup>‡\*</sup>

<sup>†</sup>*Synthetic Chemistry Division, Defense R & D Establishment, Jhansi Road, Gwalior 474002, India*

<sup>‡</sup>*Department of Chemistry, Bengal Engineering & Science University, Shibpur-711103, India*

*Corresponding authors: shubhankar\_chem@yahoo.co.in; kaushikhatua@gmail.com*

Table

Imaginary frequency (cm<sup>-1</sup>), total Energy E (a.u), Enthalpy H (a.u), Gibbs Free Energy G (a.u) and Entropy S (Cal/Mol-Kelvin) of reactant, intermediate, transition state and products at B3LYP/6-31+G(d,p)

|                 | Imaginary Freq. | E           | G           | H           | S       |
|-----------------|-----------------|-------------|-------------|-------------|---------|
| Path A          |                 |             |             |             |         |
| <b>Reactant</b> | -               | -728.543924 | -728.583587 | -728.528978 | 123.344 |
| <b>IM-1</b>     | -               | -879.390377 | -879.458090 | -879.389433 | 144.501 |
| <b>TS-1</b>     | -118.90         | -879.387721 | -879.452091 | -879.836777 | 137.464 |
| <b>IM-2</b>     | -               | -879.399514 | -879.462223 | -879.398569 | 133.971 |
| <b>TS-2</b>     | -85.96          | -879.400554 | -879.461769 | -879.399610 | 130.824 |
| <b>IM-3</b>     | -               | -879.446092 | -879.508316 | -879.445148 | 132.949 |
| <b>IM-4</b>     | -               | -803.732592 | -803.791613 | -803.731648 | 126.606 |
| <b>TS-A1</b>    | -243.98         | -803.664683 | -803.720854 | -803.663742 | 120.203 |
| <b>IM-A1</b>    | -               | -803.724203 | -803.779717 | -803.723249 | 118.827 |

|                                     |         |             |             |             |         |
|-------------------------------------|---------|-------------|-------------|-------------|---------|
| <b><math>\cdot\text{OOH}</math></b> | -       | -150.936168 | -150.960904 | -150.935224 | 54.068  |
| <b><math>\cdot\text{OH}</math></b>  | -       | -75.792521  | -75.811143  | -75.791576  | 41.182  |
| <b>Products</b>                     | -       | -803.116422 | -803.170738 | -803.115478 | 116.305 |
| Path B                              |         |             |             |             |         |
| <b>Reactant</b>                     | -       | -728.543924 | -728.583587 | -728.528978 | 123.344 |
| <b>TS-B1</b>                        | -346.26 | -728.505889 | -728.559030 | -728.504944 | 113.739 |
| <b>IM-B1</b>                        | -       | -728.512263 | -728.566423 | -728.511319 | 115.977 |
| <b>IM-B2</b>                        | -       | -880.072494 | -880.136391 | -880.071550 | 136.470 |
| <b>TS-B2</b>                        | -308.96 | -880.046602 | -880.109188 | -880.045658 | 133.709 |
| <b>IM-B3</b>                        | -       | -880.161512 | -880.224290 | -880.160568 | 134.114 |
| <b>H<sub>2</sub>O<sub>2</sub></b>   | -       | -151.528735 | -151.553629 | -151.527791 | 54.382  |
| <b><math>\cdot\text{OH}</math></b>  | -       | -75.792521  | -75.811143  | -75.791576  | 41.182  |
| <b>Products</b>                     | -       | -803.116422 | -803.170738 | -803.115478 | 116.305 |
| Path C                              |         |             |             |             |         |
| <b>Reactant</b>                     | -       | -728.543924 | -728.583587 | -728.528978 | 123.344 |
| <b>IM-C1</b>                        | -       | -880.077780 | -880.148298 | -880.076835 | 150.406 |
| <b>TS-C1</b>                        | -318.83 | -880.060495 | -880.123758 | -880.059551 | 135.134 |
| <b>IM-C2</b>                        | -       | -880.077781 | -880.148322 | -880.076837 | 150.45  |
| <b>H<sub>2</sub>O<sub>2</sub></b>   | -       | -151.528735 | -151.553629 | -151.527791 | 54.382  |
| <b><math>\cdot\text{OH}</math></b>  | -       | -75.792521  | -75.811143  | -75.791576  | 41.182  |
| <b>Products</b>                     | -       | -803.116422 | -803.170738 | -803.115478 | 116.305 |

| Path D                       |         |             |             |             |         |
|------------------------------|---------|-------------|-------------|-------------|---------|
| <b>Reactant</b>              | -       | -728.543924 | -728.583587 | -728.528978 | 123.344 |
| <b>IM-1</b>                  | -       | -879.390377 | -879.458090 | -879.389433 | 144.501 |
| <b>TS-1</b>                  | -118.90 | -879.387721 | -879.452091 | -879.836777 | 137.464 |
| <b>IM-2</b>                  | -       | -879.399514 | -879.462223 | -879.398569 | 133.971 |
| <b>TS-2</b>                  | -85.96  | -879.400554 | -879.461769 | -879.399610 | 130.824 |
| <b>IM-3</b>                  | -       | -879.446092 | -879.508316 | -879.445148 | 132.949 |
| <b>IM-4</b>                  | -       | -803.732592 | -803.791613 | -803.731648 | 126.606 |
| <b>TS-D1</b>                 | -423.47 | -803.702853 | -803.760023 | -803.701909 | 122.320 |
| <b>IM-D1</b>                 | -       | -803.722005 | -803.779327 | -803.722005 | 120.645 |
| <b><math>\cdot</math>OOH</b> | -       | -150.936168 | -150.960904 | -150.935224 | 54.068  |
| <b><math>\cdot</math>OH</b>  | -       | -75.792521  | -75.811143  | -75.791576  | 41.182  |
| <b>Aurone</b>                | -       | -727.880059 | -727.932892 | -727.879114 | 113.184 |

B3LYP/6-31+G(d,p) optimized geometry of the reactant, intermediate and transition state and product with selected atomic distance ( $\text{\AA}$ ) and Cartesian coordinate.

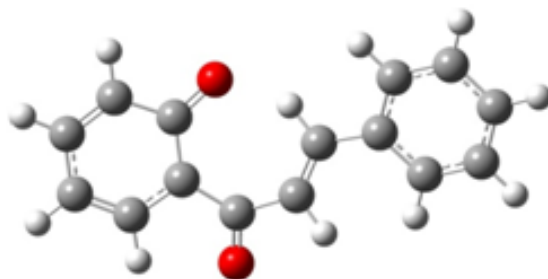

### Reactant

| Symbol | X          | Y          | Z          |
|--------|------------|------------|------------|
| C      | -3.4580150 | -1.7565610 | 0.0098110  |
| C      | -2.2094320 | -1.0408350 | 0.2192000  |
| C      | -2.2814520 | 0.4126700  | 0.0533060  |
| C      | -3.5430090 | 0.9995690  | -0.2357950 |
| C      | -4.7069020 | 0.2732960  | -0.4149820 |
| C      | -4.6481820 | -1.1358400 | -0.2898410 |
| H      | -3.3975390 | -2.8367130 | 0.1206950  |
| H      | -3.5611200 | 2.0811600  | -0.3267000 |
| H      | -5.6409560 | 0.7741470  | -0.6572020 |
| H      | -5.5498420 | -1.7327010 | -0.4308350 |
| C      | -1.1799080 | 1.4024800  | 0.1655060  |
| O      | -1.4528180 | 2.6195910  | 0.2884340  |
| O      | -1.1783880 | -1.7064410 | 0.5520690  |
| C      | 0.2891180  | 1.1481680  | 0.0429800  |
| C      | 1.0179270  | 0.0182020  | 0.1485190  |
| H      | 0.7889070  | 2.1015970  | -0.1278560 |
| H      | 0.4751270  | -0.9093420 | 0.3314050  |
| C      | 2.4829020  | -0.0568290 | 0.0298020  |
| C      | 3.0822200  | -1.3307270 | -0.0552720 |
| C      | 3.3379180  | 1.0656070  | 0.0033620  |
| C      | 4.4645880  | -1.4798390 | -0.1792150 |
| H      | 2.4400730  | -2.2069730 | -0.0265940 |
| C      | 4.7187760  | 0.9189550  | -0.1186860 |
| H      | 2.9149150  | 2.0617020  | 0.0900830  |
| C      | 5.2936810  | -0.3547050 | -0.2137310 |

|   |           |            |            |
|---|-----------|------------|------------|
| H | 4.8948980 | -2.4762480 | -0.2466870 |
| H | 5.3527690 | 1.8025580  | -0.1337980 |
| H | 6.3710330 | -0.4660550 | -0.3063160 |

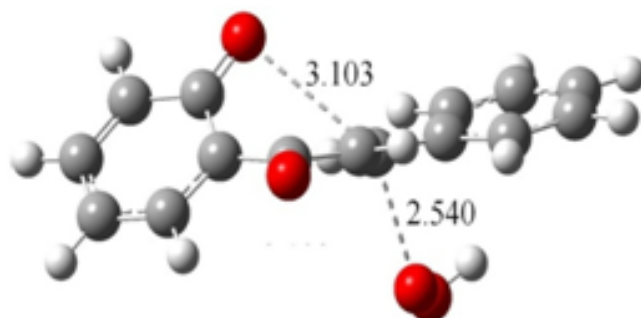

### IM-1

| Symbol | X          | Y          | Z          |
|--------|------------|------------|------------|
| C      | 2.4233530  | 1.2017440  | -0.3629440 |
| C      | 3.5695720  | 1.7377320  | 0.3555840  |
| C      | 4.6229090  | 0.9597910  | 0.8034860  |
| C      | 4.6408900  | -0.4316200 | 0.5727890  |
| C      | 3.5599000  | -0.9934760 | -0.1104590 |
| C      | 2.4510550  | -0.2520700 | -0.5508530 |
| C      | 1.4165880  | -1.0289890 | -1.3063880 |
| C      | -0.0273830 | -0.8263120 | -1.1519590 |
| C      | -0.6678040 | -0.1333980 | -0.1744750 |
| C      | -2.1124110 | 0.1090240  | -0.1327270 |
| C      | -2.6142210 | 1.1852310  | 0.6353610  |
| C      | -3.9692650 | 1.5219120  | 0.6272610  |
| C      | -4.8808660 | 0.8013220  | -0.1545740 |
| C      | -4.3997250 | -0.2692650 | -0.9261870 |

|   |            |            |            |
|---|------------|------------|------------|
| C | -3.0487480 | -0.6033510 | -0.9207450 |
| H | 3.5603140  | 2.8143100  | 0.5215450  |
| H | 5.4488220  | 1.4312510  | 1.3420140  |
| H | 5.4606560  | -1.0525880 | 0.9293560  |
| H | 3.5495440  | -2.0620840 | -0.3156690 |
| H | -0.5977330 | -1.3681890 | -1.9045300 |
| H | -0.0827560 | 0.4109030  | 0.5555610  |
| H | -1.9175800 | 1.7515890  | 1.2453830  |
| H | -4.3150160 | 2.3564680  | 1.2360020  |
| H | -5.9378470 | 1.0609890  | -0.1605770 |
| H | -5.0914380 | -0.8528990 | -1.5328340 |
| H | -2.7069230 | -1.4495320 | -1.5077890 |
| O | 1.7936210  | -1.9296280 | -2.0952420 |
| O | 1.5194050  | 1.9759350  | -0.8045370 |
| O | -1.5109840 | -1.5461300 | 1.7613410  |
| O | -2.1475490 | -0.8688540 | 2.9118890  |
| H | -2.9670490 | -0.5471800 | 2.5032030  |

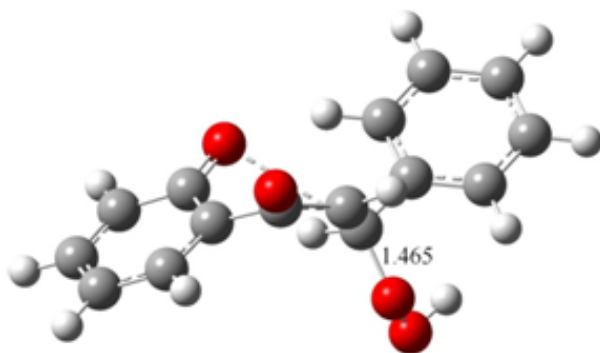

### IM-2

| Symbol | X         | Y          | Z         |
|--------|-----------|------------|-----------|
| C      | 4.5534680 | -0.2404960 | 0.4161340 |

|   |            |            |            |
|---|------------|------------|------------|
| C | 3.4825750  | -0.8032600 | -0.2947170 |
| C | 2.2484430  | -0.1679150 | -0.4757830 |
| C | 2.0528640  | 1.1812310  | 0.0501210  |
| C | 3.1845690  | 1.7302100  | 0.7674030  |
| C | 4.3823210  | 1.0492080  | 0.9481710  |
| H | 5.4861650  | -0.7880170 | 0.5475150  |
| H | 3.5980690  | -1.7861100 | -0.7487680 |
| C | 1.2454410  | -0.9218060 | -1.3409330 |
| H | 3.0505610  | 2.7353480  | 1.1674580  |
| H | 5.1938260  | 1.5233530  | 1.5068560  |
| O | 1.6908030  | -1.4129960 | -2.4290900 |
| O | 0.9853220  | 1.8753090  | -0.0978210 |
| C | -0.7335500 | -0.6823090 | 0.3043310  |
| H | -0.0905880 | -0.0131410 | 0.8782300  |
| C | -0.1044700 | -1.1010160 | -0.9566240 |
| H | -0.7419670 | -1.6032790 | -1.6827430 |
| O | -0.8879070 | -1.9444170 | 1.0330820  |
| O | -1.5106840 | -1.7096450 | 2.4721040  |
| H | -2.3914580 | -1.3912040 | 2.2123830  |
| C | -2.0815190 | -0.0196340 | 0.0767650  |
| C | -2.1472970 | 1.3798170  | -0.0804000 |
| C | -3.2709000 | -0.7624170 | -0.0343410 |
| C | -3.3664130 | 2.0061990  | -0.3370790 |
| H | -1.2091440 | 1.9317430  | -0.0302180 |
| C | -4.4934510 | -0.1302750 | -0.3018080 |
| H | -3.2194680 | -1.8435070 | 0.0722410  |
| C | -4.5515400 | 1.2581210  | -0.4492470 |

|   |            |            |            |
|---|------------|------------|------------|
| H | -3.3973680 | 3.0882880  | -0.4582320 |
| H | -5.4014870 | -0.7263510 | -0.3921160 |
| H | -5.5006690 | 1.7529220  | -0.6507700 |

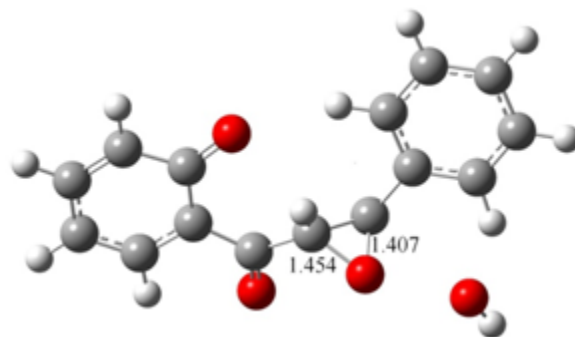

### IM-3

| Symbol | X          | Y          | Z          |
|--------|------------|------------|------------|
| C      | 2.4497820  | -1.1286570 | 0.1521050  |
| C      | 3.7407900  | -1.7999710 | 0.1939330  |
| C      | 4.9416710  | -1.1407910 | 0.0196680  |
| C      | 4.9740720  | 0.2556810  | -0.2016770 |
| C      | 3.7646070  | 0.9431960  | -0.2281340 |
| C      | 2.5141310  | 0.3207160  | -0.0383660 |
| C      | 1.3264410  | 1.2252980  | -0.0656970 |
| C      | 0.0147880  | 0.7273970  | 0.4849790  |
| C      | -1.2566050 | 0.8945730  | -0.2695140 |
| C      | -2.3346150 | -0.1538930 | -0.1771060 |
| C      | -2.0128080 | -1.5185680 | -0.2376400 |
| C      | -3.0316160 | -2.4815780 | -0.2053060 |
| C      | -4.3696110 | -2.0847490 | -0.1034640 |
| C      | -4.6819190 | -0.7194440 | -0.0285840 |
| C      | -3.6771480 | 0.2534730  | -0.0650890 |
| H      | 3.7090170  | -2.8766250 | 0.3531640  |



|   |            |            |            |
|---|------------|------------|------------|
| H | 5.8759380  | -1.7058380 | 0.0517160  |
| H | 5.9182240  | 0.7799440  | -0.3365220 |
| H | 3.7470110  | 2.0180770  | -0.3935800 |
| H | 0.0877270  | -0.1324560 | 1.1443730  |
| H | -1.2321360 | 1.4551270  | -1.2053560 |
| H | -0.9680830 | -1.8203830 | -0.2910020 |
| H | -2.7750290 | -3.5391690 | -0.2496870 |
| H | -5.1620630 | -2.8338100 | -0.0754850 |
| H | -5.7238040 | -0.4098610 | 0.0633680  |
| H | -3.8428700 | 1.3519230  | -0.0029220 |
| O | 1.4219700  | 2.3818100  | -0.4963560 |
| O | 1.3773930  | -1.8016810 | 0.2547410  |
| O | -0.9920550 | 1.7131110  | 0.8450460  |
| O | -3.0976890 | 2.9961920  | 0.1123500  |
| H | -3.4826520 | 3.8415170  | -0.1649480 |

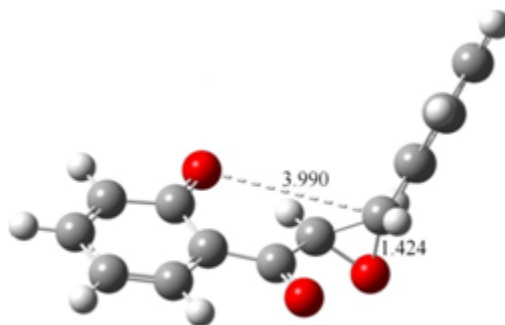

#### IM-4

| Symbol | X         | Y         | Z         |
|--------|-----------|-----------|-----------|
| C      | 4.7861290 | 0.1487770 | 0.5037860 |
| C      | 3.6125500 | 0.8679110 | 0.3782230 |

|   |            |            |            |
|---|------------|------------|------------|
| C | 2.3725720  | 0.2688000  | 0.0360190  |
| C | 2.2979900  | -1.1827780 | -0.1613090 |
| C | 3.5684000  | -1.8842970 | -0.0441560 |
| C | 4.7465840  | -1.2526050 | 0.2796730  |
| H | 5.7196190  | 0.6441330  | 0.7585010  |
| H | 3.6061540  | 1.9437310  | 0.5326910  |
| C | 1.2354130  | 1.1813930  | -0.1004100 |
| H | 3.5312260  | -2.9588070 | -0.2080550 |
| H | 5.6632410  | -1.8368630 | 0.3671450  |
| C | -1.3437560 | 1.1854660  | -0.0112490 |
| C | -0.0930710 | 0.6440090  | -0.6096150 |
| H | -0.0984040 | -0.3691740 | -0.9990150 |
| O | 1.2969120  | 2.3926250  | 0.1707570  |
| O | 1.2361710  | -1.8341380 | -0.3991000 |
| C | -2.5975040 | 0.3863850  | 0.0993960  |
| C | -3.1511530 | -0.2625990 | -1.0142340 |
| C | -3.2482300 | 0.2765260  | 1.3370630  |
| C | -4.3203890 | -1.0138590 | -0.8874660 |
| H | -2.6536640 | -0.1653610 | -1.9739820 |
| C | -4.4168090 | -0.4780490 | 1.4659740  |
| H | -2.8301020 | 0.7820250  | 2.2045060  |
| C | -4.9586040 | -1.1271720 | 0.3526950  |
| H | -4.7349500 | -1.5145690 | -1.7589230 |
| H | -4.9041440 | -0.5575060 | 2.4345990  |
| H | -5.8679370 | -1.7147340 | 0.4498220  |
| H | -1.2022210 | 1.9519030  | 0.7529100  |
| O | -0.9292770 | 1.5974840  | -1.3099730 |

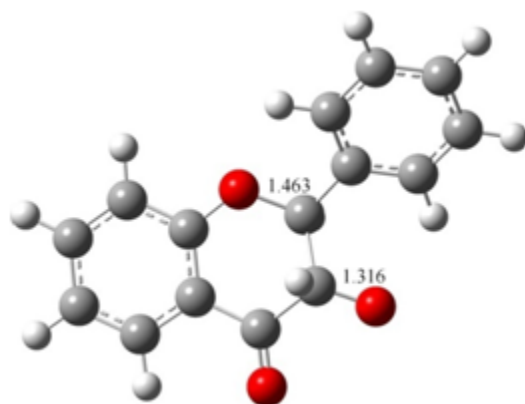

**IM-A1**

| <b>Symbol</b> | <b>X</b>   | <b>Y</b>   | <b>Z</b>   |
|---------------|------------|------------|------------|
| C             | -4.4058280 | -0.7541100 | 0.0029930  |
| C             | -3.6436580 | 0.4086960  | -0.0808530 |
| C             | -2.2410430 | 0.3702360  | -0.0531130 |
| C             | -1.6026180 | -0.8765970 | 0.0866630  |
| C             | -2.3644390 | -2.0557290 | 0.1764420  |
| C             | -3.7544420 | -1.9912370 | 0.1276520  |
| H             | -5.4911300 | -0.7060450 | -0.0306170 |
| H             | -4.1076220 | 1.3858310  | -0.1830270 |
| C             | -1.4366560 | 1.6371540  | -0.1745250 |
| H             | -1.8439280 | -3.0021760 | 0.2885220  |
| H             | -4.3344660 | -2.9088520 | 0.1963410  |
| C             | 0.5307110  | 0.1831630  | 0.4266700  |
| C             | 0.0903090  | 1.4729980  | -0.3965240 |
| C             | 1.9791440  | -0.1835050 | 0.2149010  |
| C             | 2.9781180  | 0.7409760  | 0.5745520  |
| C             | 2.3685530  | -1.4094880 | -0.3445240 |
| C             | 4.3263920  | 0.4362960  | 0.3766710  |

|   |            |            |            |
|---|------------|------------|------------|
| H | 2.6616060  | 1.7065620  | 0.9531350  |
| C | 3.7218430  | -1.7136350 | -0.5339360 |
| H | 1.6079620  | -2.1267900 | -0.6307920 |
| C | 4.7086020  | -0.7931970 | -0.1728780 |
| H | 5.0838930  | 1.1684360  | 0.6477720  |
| H | 4.0007420  | -2.6723360 | -0.9663530 |
| H | 5.7606300  | -1.0282590 | -0.3196470 |
| O | -0.2596020 | -1.0111920 | 0.1277740  |
| O | -2.0049870 | 2.7216250  | -0.1532210 |
| O | 0.8489160  | 2.5183170  | -0.1430340 |
| H | 0.0940940  | 1.1035190  | -1.4780200 |
| H | 0.3636680  | 0.4179770  | 1.4893940  |

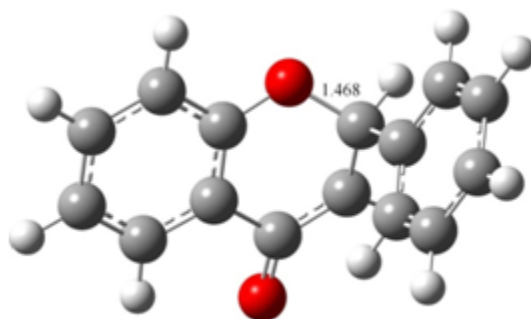

### IM-B1

| Symbol | X         | Y          | Z          |
|--------|-----------|------------|------------|
| C      | 3.4637550 | -1.1821690 | 0.9941490  |
| C      | 2.9322380 | 0.1076970  | 0.8956030  |
| C      | 1.8367380 | 0.3886550  | 0.0712090  |
| C      | 1.2724370 | -0.6709620 | -0.6671060 |
| C      | 1.8027700 | -1.9650090 | -0.5884370 |

|   |            |            |            |
|---|------------|------------|------------|
| C | 2.8973920  | -2.2195110 | 0.2438600  |
| H | 4.3154890  | -1.3768580 | 1.6423620  |
| H | 3.3570470  | 0.9496720  | 1.4353600  |
| C | 1.3212090  | 1.8010300  | -0.0815940 |
| H | 3.3003450  | -3.2283430 | 0.3067950  |
| C | -0.6100910 | 0.7067340  | -1.3043210 |
| C | 0.1633980  | 1.8991600  | -0.8443800 |
| H | -0.2712140 | 2.8765030  | -1.0400620 |
| C | -1.7817770 | 0.2503300  | -0.4101320 |
| C | -1.7887280 | 0.4809550  | 0.9716550  |
| C | -2.8737640 | -0.4221750 | -0.9785510 |
| C | -2.8471310 | 0.0308290  | 1.7658830  |
| H | -0.9608510 | 1.0337390  | 1.4060100  |
| C | -3.9427990 | -0.8619720 | -0.1930790 |
| H | -2.8804650 | -0.6048270 | -2.0519240 |
| C | -3.9307040 | -0.6397280 | 1.1880030  |
| H | -2.8303590 | 0.2117170  | 2.8383670  |
| H | -4.7831870 | -1.3754670 | -0.6557810 |
| H | -4.7598370 | -0.9781960 | 1.8052190  |
| O | 0.2260580  | -0.4797130 | -1.5245300 |
| H | 1.3448930  | -2.7538360 | -1.1791700 |
| H | -1.0405470 | 0.8858750  | -2.2993560 |
| O | 1.9888210  | 2.7468180  | 0.4514810  |

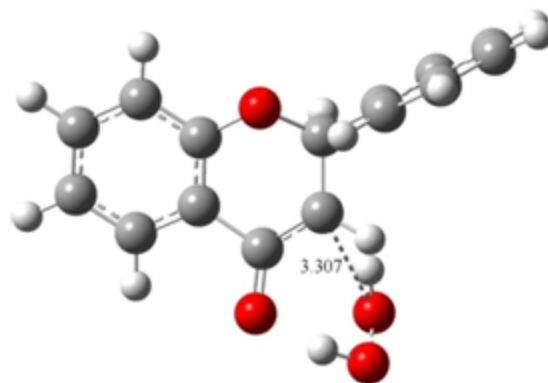

### IM-B2

| Symbol | X          | Y          | Z          |
|--------|------------|------------|------------|
| C      | 4.1830080  | -1.4900140 | -0.0753230 |
| C      | 3.4786890  | -0.3022000 | 0.1388590  |
| C      | 2.0795890  | -0.2718490 | 0.1148330  |
| C      | 1.3166100  | 0.9741120  | 0.4582940  |
| C      | -0.0474910 | 0.9103710  | 0.2192330  |
| C      | -0.6398980 | -0.2678380 | -0.5021850 |
| C      | -2.1166780 | -0.4521310 | -0.2157820 |
| C      | -3.0737820 | -0.1450280 | -1.1888210 |
| C      | -4.4408260 | -0.2708930 | -0.9171430 |
| C      | -4.8648630 | -0.7234010 | 0.3342490  |
| C      | -3.9133340 | -1.0411200 | 1.3109970  |
| C      | -2.5515150 | -0.8992900 | 1.0399640  |
| H      | 1.5142930  | -3.5852820 | -0.4973970 |
| H      | 4.0146790  | -3.6117020 | -0.4623930 |
| H      | 5.2700890  | -1.4928690 | -0.0567880 |
| H      | 3.9859690  | 0.6332340  | 0.3551110  |
| H      | -0.7116150 | 1.6930540  | 0.5734970  |
| H      | -0.5200490 | -0.2030400 | -1.6015500 |

|   |            |            |            |
|---|------------|------------|------------|
| H | -2.7450890 | 0.1996790  | -2.1665870 |
| H | -5.1701310 | -0.0193560 | -1.6832690 |
| H | -5.9256370 | -0.8273930 | 0.5487530  |
| H | -4.2351560 | -1.3940610 | 2.2878360  |
| H | -1.8092810 | -1.1349300 | 1.7959380  |
| O | 0.0212380  | -1.5267230 | -0.1433390 |
| O | 1.9738860  | 1.9538270  | 0.9717890  |
| O | 0.5899850  | 3.9043410  | -1.0347780 |
| H | 0.2002010  | 3.0084660  | -1.0041130 |
| O | 0.7514240  | 4.1923900  | 0.3901160  |
| H | 1.2980940  | 3.3896620  | 0.6899800  |

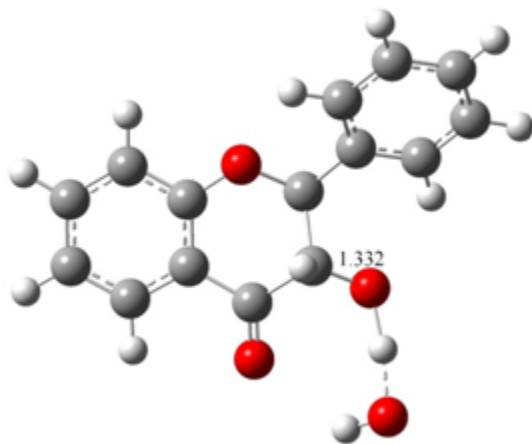

### IM-B3

| Symbol | X          | Y          | Z          |
|--------|------------|------------|------------|
| C      | -1.6082380 | -1.2311630 | 0.0329200  |
| C      | -2.3692930 | -2.4131080 | -0.0063920 |
| C      | -3.7588620 | -2.3423730 | -0.0336680 |
| C      | -4.4115230 | -1.0992080 | -0.0111430 |
| C      | -3.6512660 | 0.0659090  | 0.0280770  |

|   |            |            |            |
|---|------------|------------|------------|
| C | -2.2479910 | 0.0224740  | 0.0402090  |
| C | -1.4406740 | 1.2858000  | 0.0418560  |
| C | 0.0851510  | 1.1375200  | -0.1803830 |
| C | 0.5270510  | -0.2209430 | 0.4862250  |
| C | 1.9784260  | -0.5630320 | 0.2362690  |
| C | 2.9788030  | 0.2891300  | 0.7375520  |
| C | 4.3268780  | 0.0040070  | 0.5130370  |
| C | 4.7048140  | -1.1350200 | -0.2071120 |
| C | 3.7160040  | -1.9841430 | -0.7083630 |
| C | 2.3630900  | -1.6990010 | -0.4900610 |
| H | -1.8488230 | -3.3659500 | -0.0086260 |
| H | -4.3392850 | -3.2615350 | -0.0645280 |
| H | -5.4967660 | -1.0490480 | -0.0288030 |
| H | -4.1162060 | 1.0475480  | 0.0384610  |
| H | 0.1255480  | 0.9292190  | -1.2941460 |
| H | 0.3591900  | -0.1120570 | 1.5687640  |
| H | 2.6696850  | 1.1912920  | 1.2531030  |
| H | 5.0862840  | 0.6813580  | 0.8964750  |
| H | 5.7563570  | -1.3547070 | -0.3774320 |
| H | 3.9926910  | -2.8713410 | -1.2737450 |
| H | 1.6006900  | -2.3613930 | -0.8836310 |
| O | -0.2642040 | -1.3673630 | 0.0469700  |
| O | -1.9978170 | 2.3712350  | 0.1602950  |
| O | 0.8394100  | 2.1537350  | 0.2353370  |
| H | 0.4771380  | 3.6828150  | -0.3589840 |
| O | 0.0993280  | 4.5572780  | -0.6768630 |
| H | -0.8344670 | 4.4236290  | -0.4669520 |



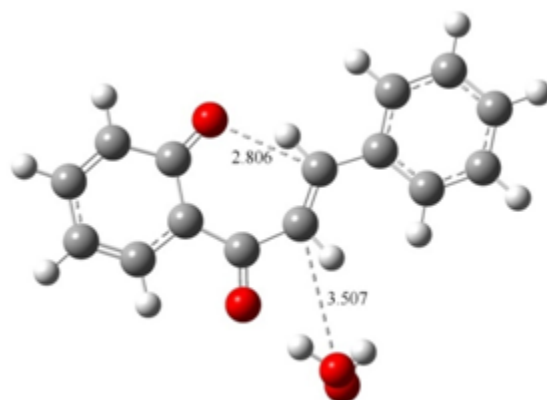

### IM-C1

| Symbol | X          | Y          | Z          |
|--------|------------|------------|------------|
| C      | -2.2853830 | -1.5965320 | 0.2428950  |
| C      | -3.5667670 | -2.2857630 | 0.1855120  |
| C      | -4.7522540 | -1.6565580 | -0.1006780 |
| C      | -4.7758070 | -0.2634500 | -0.3680720 |
| C      | -3.5870050 | 0.4356280  | -0.3424910 |
| C      | -2.3209360 | -0.1635860 | -0.0719910 |
| C      | -1.1910020 | 0.7761300  | -0.1448260 |
| C      | 0.2649540  | 0.4753950  | -0.2149740 |
| C      | 0.9702440  | -0.6421240 | 0.0622210  |
| C      | 2.4341530  | -0.7601330 | -0.0314390 |
| C      | 3.0171400  | -2.0134970 | 0.2465830  |
| C      | 4.3980490  | -2.2062060 | 0.1792060  |
| C      | 5.2388780  | -1.1454000 | -0.1687200 |
| C      | 4.6788250  | 0.1078010  | -0.4476230 |
| C      | 3.2999400  | 0.2986580  | -0.3800980 |
| H      | -3.5287880 | -3.3500310 | 0.4039240  |
| H      | -5.6793770 | -2.2294610 | -0.1213200 |

|   |            |            |            |
|---|------------|------------|------------|
| H | -5.7094220 | 0.2428580  | -0.5988300 |
| H | -3.5829940 | 1.5002360  | -0.5495590 |
| H | 0.7991910  | 1.3732390  | -0.5206070 |
| H | 0.4122970  | -1.5221260 | 0.3776400  |
| H | 2.3645720  | -2.8394650 | 0.5166050  |
| H | 4.8170530  | -3.1852460 | 0.3984760  |
| H | 6.3149020  | -1.2897480 | -0.2215250 |
| H | 5.3221330  | 0.9415080  | -0.7184210 |
| H | 2.8911730  | 1.2803180  | -0.5986740 |
| O | -1.4428080 | 2.0162110  | -0.2346040 |
| O | -1.2612140 | -2.2645250 | 0.5792220  |
| O | 0.3472350  | 3.9806800  | -0.3198860 |
| H | -0.3666920 | 3.2737420  | -0.2759760 |
| O | 0.3578780  | 4.4865340  | 1.0464700  |
| H | 0.9990490  | 3.8908090  | 1.4656250  |

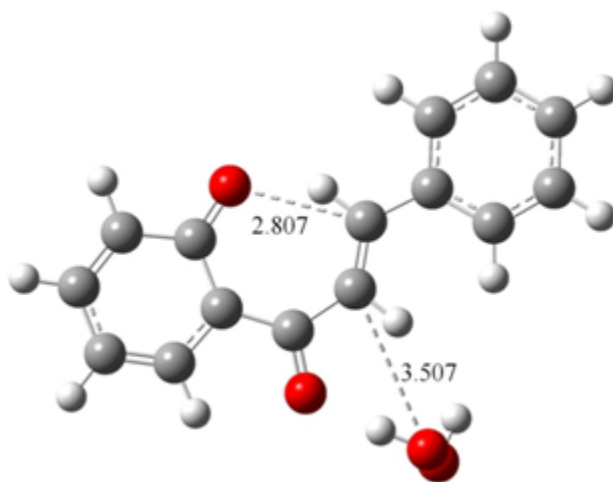

**IM-C2**

| <b>Symbol</b> | <b>X</b>   | <b>Y</b>   | <b>Z</b>  |
|---------------|------------|------------|-----------|
| C             | -2.2859980 | -1.5942020 | 0.2470840 |

|   |            |            |            |
|---|------------|------------|------------|
| C | -3.5668640 | -2.2841650 | 0.1878160  |
| C | -4.7517700 | -1.6562070 | -0.1036160 |
| C | -4.7751710 | -0.2638690 | -0.3749350 |
| C | -3.5867200 | 0.4358050  | -0.3478400 |
| C | -2.3212680 | -0.1622760 | -0.0722330 |
| C | -1.1913370 | 0.7774320  | -0.1446740 |
| C | 0.2644400  | 0.4760930  | -0.2157590 |
| C | 0.9695200  | -0.6409640 | 0.0637960  |
| C | 2.4332190  | -0.7601010 | -0.0316130 |
| C | 3.0157310  | -2.0135260 | 0.2471330  |
| C | 4.3964090  | -2.2072710 | 0.1780370  |
| C | 5.2374950  | -1.1474480 | -0.1722590 |
| C | 4.6779290  | 0.1058380  | -0.4517490 |
| C | 3.2992670  | 0.2977150  | -0.3825790 |
| H | -3.5291530 | -3.3477850 | 0.4094160  |
| H | -5.6785890 | -2.2295590 | -0.1254030 |
| H | -5.7083150 | 0.2413460  | -0.6099460 |
| H | -3.5825150 | 1.4998440  | -0.5578750 |
| H | 0.7986500  | 1.3728740  | -0.5245810 |
| H | 0.4115040  | -1.5196880 | 0.3826970  |
| H | 2.3629750  | -2.8387290 | 0.5190380  |
| H | 4.8150400  | -3.1863500 | 0.3978470  |
| H | 6.3133460  | -1.2925960 | -0.2263590 |
| H | 5.3214450  | 0.9388250  | -0.7242600 |
| H | 2.8908930  | 1.2794610  | -0.6015200 |
| O | -1.4429840 | 2.0174810  | -0.2347110 |
| O | -1.2624780 | -2.2604000 | 0.5889620  |

|   |            |           |            |
|---|------------|-----------|------------|
| O | 0.3486740  | 3.9808420 | -0.3170670 |
| H | -0.3658470 | 3.2744800 | -0.2741430 |
| O | 0.3638180  | 4.4806700 | 1.0514520  |
| H | 1.0050400  | 3.8820200 | 1.4663530  |

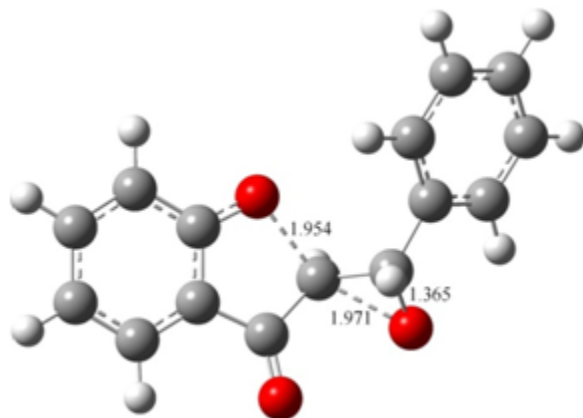

### IM-D1

| Symbol | X          | Y          | Z          |
|--------|------------|------------|------------|
| C      | -1.7666040 | -0.2948330 | -0.7543110 |
| C      | -1.5959090 | -0.4153880 | 0.6306600  |
| C      | -2.3636990 | 0.3505340  | 1.5095610  |
| C      | -3.2972130 | 1.2445140  | 0.9802620  |
| C      | -3.4524630 | 1.3606210  | -0.4150000 |
| C      | -2.6906800 | 0.5987210  | -1.3049000 |
| C      | -0.0868740 | -1.8336860 | -0.5266720 |
| C      | -0.5798200 | -1.4675990 | 0.8488750  |
| H      | -2.2226660 | 0.2419590  | 2.5815940  |
| H      | -3.9045820 | 1.8572300  | 1.6410220  |
| H      | -4.1838080 | 2.0609550  | -0.8120220 |
| H      | -2.8075760 | 0.6872030  | -2.3806390 |

|   |            |            |            |
|---|------------|------------|------------|
| O | -0.2154320 | -1.9300880 | 1.9284790  |
| O | -0.9705950 | -1.1232390 | -1.4632230 |
| C | 1.5243000  | -1.4891010 | -0.8499020 |
| H | -0.1422050 | -2.8974140 | -0.7556280 |
| C | 1.8213410  | -0.0323900 | -0.4247720 |
| C | 1.4516770  | 1.0732150  | -1.2033680 |
| C | 2.5373690  | 0.1929760  | 0.7586910  |
| C | 1.7684400  | 2.3761820  | -0.8023770 |
| H | 0.9161150  | 0.9083280  | -2.1362490 |
| C | 2.8529980  | 1.4911080  | 1.1669560  |
| H | 2.8415740  | -0.6838400 | 1.3232950  |
| C | 2.4692550  | 2.5910630  | 0.3889180  |
| H | 1.4723910  | 3.2221050  | -1.4203260 |
| H | 3.4054890  | 1.6493850  | 2.0915760  |
| H | 2.7196560  | 3.6021400  | 0.7036290  |
| H | 1.4537180  | -1.4746430 | -1.9723560 |
| O | 2.2984250  | -2.4028010 | -0.3252100 |

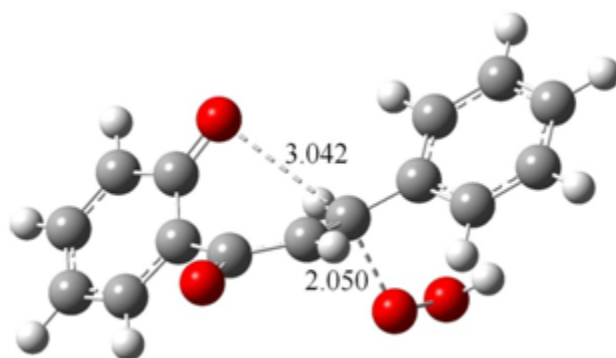

TS-1

| Symbol | X         | Y         | Z          |
|--------|-----------|-----------|------------|
| C      | 2.2916580 | 1.1310380 | -0.4300550 |

|   |            |            |            |
|---|------------|------------|------------|
| C | 3.4432630  | 1.8401890  | 0.1008300  |
| C | 4.5642080  | 1.2086430  | 0.6174260  |
| C | 4.6458200  | -0.1967080 | 0.6404540  |
| C | 3.5630240  | -0.9216610 | 0.1285190  |
| C | 2.3950180  | -0.3301250 | -0.3739370 |
| C | 1.3803970  | -1.2979980 | -0.9404940 |
| C | -0.0430930 | -1.1667280 | -0.7423290 |
| C | -0.6988400 | -0.2723470 | 0.0877230  |
| C | -2.1204980 | 0.0596520  | -0.1397300 |
| C | -2.5367500 | 1.4046600  | -0.1275400 |
| C | -3.8682720 | 1.7567730  | -0.3704450 |
| C | -4.8283380 | 0.7713600  | -0.6246410 |
| C | -4.4318380 | -0.5745170 | -0.6252680 |
| C | -3.1028530 | -0.9235950 | -0.3822170 |
| H | 3.3808590  | 2.9278080  | 0.0713600  |
| H | 5.3890820  | 1.8098140  | 1.0092920  |
| H | 5.5174180  | -0.7067050 | 1.0481550  |
| H | 3.6074200  | -2.0089040 | 0.1079470  |
| H | -0.6252610 | -1.8863040 | -1.3173860 |
| H | -0.1164570 | 0.5205220  | 0.5372900  |
| H | -1.7885780 | 2.1713520  | 0.0528380  |
| H | -4.1563140 | 2.8070980  | -0.3605320 |
| H | -5.8664240 | 1.0425010  | -0.8098100 |
| H | -5.1685480 | -1.3565500 | -0.8059250 |
| H | -2.8054950 | -1.9667830 | -0.3488750 |
| O | 1.8185280  | -2.2761030 | -1.6089450 |
| O | 1.3091620  | 1.7798480  | -0.9178500 |

|   |            |            |           |
|---|------------|------------|-----------|
| O | -1.0692250 | -1.2360240 | 1.8589000 |
| O | -1.8748010 | -0.4868410 | 2.8506510 |
| H | -2.7544540 | -0.5327040 | 2.4438120 |

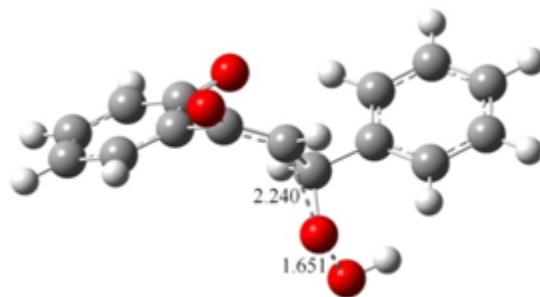

**TS-2**

| <b>Symbol</b> | <b>X</b>   | <b>Y</b>   | <b>Z</b>   |
|---------------|------------|------------|------------|
| C             | 2.0565880  | 1.1859870  | 0.0509660  |
| C             | 3.1853440  | 1.7369710  | 0.7721460  |
| C             | 4.3833700  | 1.0580530  | 0.9553800  |
| C             | 4.5591660  | -0.2317080 | 0.4239070  |
| C             | 3.4916960  | -0.7974010 | -0.2884820 |
| C             | 2.2565290  | -0.1639870 | -0.4714920 |
| C             | 1.2560180  | -0.9168150 | -1.3346810 |
| C             | -0.1039180 | -1.0745540 | -0.9632940 |
| C             | -0.7392830 | -0.6671530 | 0.3006060  |
| C             | -2.0897560 | -0.0056690 | 0.0813090  |
| C             | -2.1607520 | 1.3950230  | -0.0549810 |
| C             | -3.3822270 | 2.0204840  | -0.3049660 |
| C             | -4.5631320 | 1.2689970  | -0.4298610 |
| C             | -4.4990920 | -0.1215240 | -0.3034350 |
| C             | -3.2741910 | -0.7520140 | -0.0450270 |
| H             | 3.0485430  | 2.7416300  | 1.1721440  |

|   |            |            |            |
|---|------------|------------|------------|
| H | 5.1924860  | 1.5335870  | 1.5162010  |
| H | 5.4923290  | -0.7772080 | 0.5591490  |
| H | 3.6091740  | -1.7811250 | -0.7399560 |
| H | -0.7383420 | -1.5788840 | -1.6898430 |
| H | -0.0995030 | -0.0055170 | 0.8873830  |
| H | -1.2261590 | 1.9514770  | 0.0053120  |
| H | -3.4177100 | 3.1040470  | -0.4108010 |
| H | -5.5142440 | 1.7624930  | -0.6252060 |
| H | -5.4044680 | -0.7199800 | -0.4035640 |
| H | -3.2167480 | -1.8342050 | 0.0450690  |
| O | 1.6983510  | -1.4239450 | -2.4146000 |
| O | 0.9901840  | 1.8781120  | -0.1053470 |
| O | -0.8616040 | -1.9525250 | 0.9542160  |
| O | -1.5240620 | -1.8137390 | 2.4607430  |
| H | -2.4064750 | -1.5076730 | 2.1954410  |

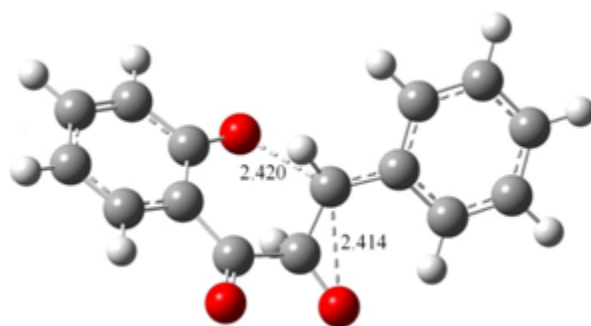

TS-A1

| Symbol | X          | Y          | Z         |
|--------|------------|------------|-----------|
| C      | -1.9192430 | -0.9285690 | 0.5430510 |
| C      | -3.0021810 | -1.8831310 | 0.5845730 |
| C      | -4.2486400 | -1.6232520 | 0.0512240 |



|   |            |            |            |
|---|------------|------------|------------|
| C | -4.5223260 | -0.3854500 | -0.5716260 |
| C | -3.5160490 | 0.5667550  | -0.6215780 |
| C | -2.2247100 | 0.3444900  | -0.0892400 |
| C | -1.2885410 | 1.5080730  | -0.1574740 |
| C | 0.1740880  | 1.3502700  | 0.5274290  |
| C | 0.7701540  | 0.1659470  | -0.1631210 |
| C | 2.1740470  | -0.1215130 | -0.2209590 |
| C | 3.1705140  | 0.7718230  | 0.2561030  |
| C | 4.5055760  | 0.3726720  | 0.2870000  |
| C | 4.8859590  | -0.8901470 | -0.1823340 |
| C | 3.9164890  | -1.7731100 | -0.6824190 |
| C | 2.5809170  | -1.3919930 | -0.7089070 |
| H | -2.7833440 | -2.8322210 | 1.0670930  |
| H | -5.0266930 | -2.3840910 | 0.1094740  |
| H | -5.4994450 | -0.1830550 | -1.0024160 |
| H | -3.6975440 | 1.5349520  | -1.0795560 |
| H | -0.1583420 | 0.9027870  | 1.5019650  |
| H | 0.1489810  | -0.4672770 | -0.7837440 |
| H | 2.8286980  | 1.7570470  | 0.5637500  |
| H | 5.2611790  | 1.0599030  | 0.6596930  |
| H | 5.9333390  | -1.1828940 | -0.1741560 |
| H | 4.2093210  | -2.7539840 | -1.0479990 |
| H | 1.8212880  | -2.0808770 | -1.0681830 |
| O | -0.7800440 | -1.2459410 | 1.0469150  |
| O | -1.5990400 | 2.5715250  | -0.6637690 |
| O | 0.9073650  | 2.4409810  | 0.6348220  |

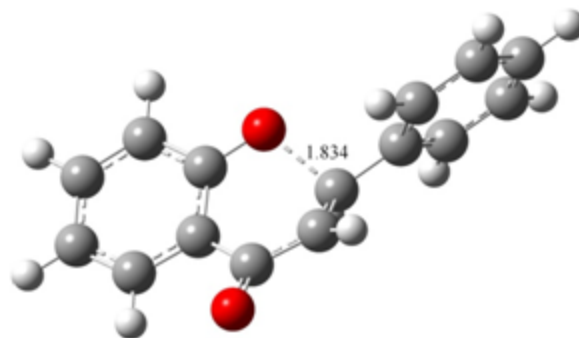

**TS-B1**

| Symbol | X          | Y          | Z          |
|--------|------------|------------|------------|
| C      | -1.5861110 | -0.3925680 | -0.5746280 |
| C      | -2.5645190 | -1.2149150 | -1.1975220 |
| C      | -3.9193360 | -1.0772360 | -0.9142530 |
| C      | -4.3673800 | -0.0845240 | -0.0283960 |
| C      | -3.4278780 | 0.7798810  | 0.5331150  |
| C      | -2.0532830 | 0.6641020  | 0.2836410  |
| C      | -1.1401120 | 1.7871450  | 0.7246620  |
| C      | 0.2525580  | 1.5022590  | 0.6374170  |
| C      | 0.6626950  | 0.1569280  | 0.5234300  |
| C      | 2.0778710  | -0.1641470 | 0.2010670  |
| C      | 2.7783280  | 0.5459130  | -0.7890380 |
| C      | 4.1087800  | 0.2432920  | -1.0811480 |
| C      | 4.7683470  | -0.7827740 | -0.3942340 |
| C      | 4.0784140  | -1.5078940 | 0.5821350  |
| C      | 2.7447530  | -1.2046970 | 0.8669410  |
| H      | -2.2107580 | -1.9853600 | -1.8778450 |
| H      | -4.6333780 | -1.7532970 | -1.3831080 |
| H      | -5.4261190 | 0.0249490  | 0.1942670  |
| H      | -3.7382650 | 1.6084480  | 1.1648830  |

|   |            |            |            |
|---|------------|------------|------------|
| H | 0.9522560  | 2.3219780  | 0.5075870  |
| H | 0.2239510  | -0.5649700 | 1.2148750  |
| H | 2.2590740  | 1.3278790  | -1.3340900 |
| H | 4.6320140  | 0.8032280  | -1.8528380 |
| H | 5.8041430  | -1.0201950 | -0.6246810 |
| H | 4.5767130  | -2.3128360 | 1.1174720  |
| H | 2.2069100  | -1.7776900 | 1.6184050  |
| O | -0.3094700 | -0.6455060 | -0.8179050 |
| O | -1.6329070 | 2.9124950  | 0.9914530  |

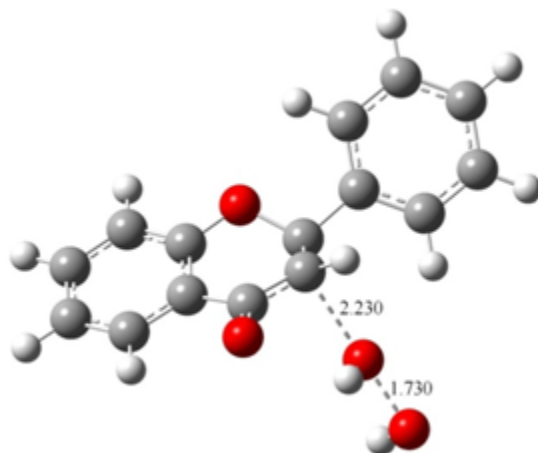

**TS-B2**

| <b>Symbol</b> | <b>X</b>  | <b>Y</b>   | <b>Z</b>   |
|---------------|-----------|------------|------------|
| C             | 1.6798260 | -1.1276260 | -0.2224090 |
| C             | 2.5134910 | -2.1107220 | -0.7730990 |
| C             | 3.8949650 | -1.9117650 | -0.8020330 |
| C             | 4.4520510 | -0.7391890 | -0.2742560 |
| C             | 3.6152950 | 0.2220820  | 0.2952120  |
| C             | 2.2261250 | 0.0499260  | 0.3310810  |
| C             | 1.3367260 | 1.0102660  | 1.0740260  |

|   |            |            |            |
|---|------------|------------|------------|
| C | -0.0438450 | 0.8299870  | 0.8399410  |
| C | -0.4841570 | -0.1627340 | -0.1998990 |
| C | -1.9367540 | -0.5670560 | -0.0648500 |
| C | -2.9224940 | 0.4152460  | -0.2600690 |
| C | -4.2750910 | 0.0914880  | -0.1401490 |
| C | -4.6663160 | -1.2158680 | 0.1728460  |
| C | -3.6889490 | -2.1948400 | 0.3660940  |
| C | -2.3317650 | -1.8727700 | 0.2480530  |
| H | 2.0620160  | -3.0115400 | -1.1788020 |
| H | 4.5360100  | -2.6720910 | -1.2426670 |
| H | 5.5280270  | -0.5854530 | -0.2984200 |
| H | 4.0113820  | 1.1239550  | 0.7531770  |
| H | -0.7610150 | 1.2022930  | 1.5608430  |
| H | -0.3438400 | 0.2641180  | -1.2076210 |
| H | -2.6118090 | 1.4308490  | -0.4923370 |
| H | -5.0258240 | 0.8634200  | -0.2914670 |
| H | -5.7205100 | -1.4664330 | 0.2648240  |
| H | -3.9797480 | -3.2140070 | 0.6109770  |
| H | -1.5713770 | -2.6313360 | 0.3973060  |
| O | 0.3383730  | -1.3755090 | -0.2005860 |
| O | 1.8525740  | 1.8595650  | 1.8526000  |
| O | -0.4514150 | 2.6299950  | -0.4130530 |
| H | 0.1003860  | 3.0883320  | 0.2404750  |
| O | -0.7610670 | 4.0768200  | -1.3102770 |
| H | -0.2660600 | 3.7823820  | -2.0886990 |

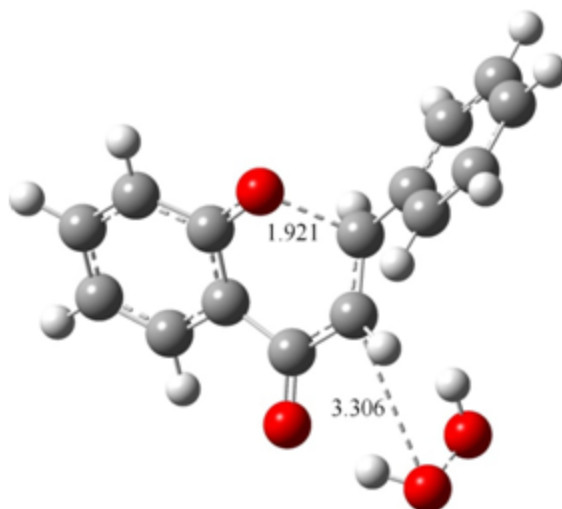

**TS-C1**

| <b>Symbol</b> | <b>X</b>   | <b>Y</b>   | <b>Z</b>   |
|---------------|------------|------------|------------|
| C             | -1.4871260 | -1.5143370 | -0.1767020 |
| C             | -2.3501620 | -2.6480710 | -0.2479040 |
| C             | -3.7127260 | -2.5455420 | -0.0074090 |
| C             | -4.3047290 | -1.2994170 | 0.2671860  |
| C             | -3.4985620 | -0.1663600 | 0.2571670  |
| C             | -2.1115980 | -0.2283460 | 0.0342120  |
| C             | -1.3789520 | 1.0466370  | -0.2222490 |
| C             | 0.0506970  | 0.9786270  | -0.2366540 |
| C             | 0.6728260  | -0.1280210 | 0.3597930  |
| C             | 2.1137740  | -0.4166110 | 0.1678550  |
| C             | 2.8521010  | -1.0161490 | 1.2007230  |
| C             | 4.2116250  | -1.2965350 | 1.0473070  |
| C             | 4.8565840  | -0.9928320 | -0.1548470 |
| C             | 4.1282020  | -0.4117660 | -1.1993580 |
| C             | 2.7713820  | -0.1306810 | -1.0405910 |
| H             | -1.8881480 | -3.6098000 | -0.4537450 |

|   |            |            |            |
|---|------------|------------|------------|
| H | -4.3255350 | -3.4457430 | -0.0275820 |
| H | -5.3718700 | -1.2207590 | 0.4573250  |
| H | -3.9269800 | 0.8225700  | 0.3957690  |
| H | 0.5856850  | 1.6330660  | -0.9194190 |
| H | 0.3011210  | -0.4473190 | 1.3312190  |
| H | 2.3488580  | -1.2639040 | 2.1318050  |
| H | 4.7650500  | -1.7556160 | 1.8627260  |
| H | 5.9136070  | -1.2133750 | -0.2807600 |
| H | 4.6187300  | -0.1832100 | -2.1422080 |
| H | 2.2052550  | 0.3005700  | -1.8597880 |
| O | -2.0327700 | 2.0826850  | -0.5434590 |
| O | -0.1950800 | -1.7073390 | -0.3058100 |
| O | -0.4673140 | 4.2436320  | -0.3216920 |
| H | -1.1505530 | 3.5189220  | -0.4457780 |
| O | 0.0301350  | 3.9379060  | 1.0165770  |
| H | 0.3649820  | 3.0259530  | 0.8943290  |

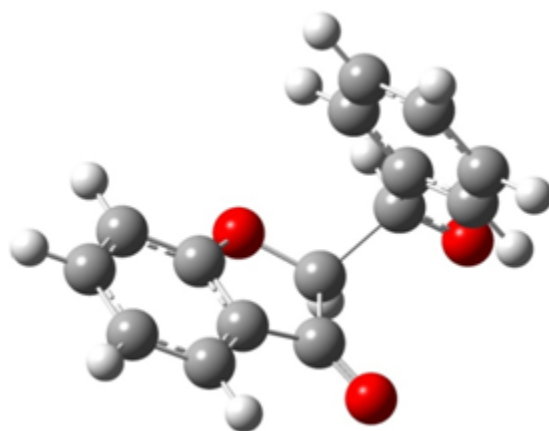

**TS-D1**

| <b>Symbol</b> | <b>X</b>  | <b>Y</b>  | <b>Z</b>  |
|---------------|-----------|-----------|-----------|
| C             | 0.3026580 | 0.1872560 | 0.3921480 |

|   |            |            |            |
|---|------------|------------|------------|
| C | 0.3329170  | -0.2388400 | 1.7518140  |
| C | 1.3517920  | -1.0796830 | 2.1810680  |
| C | 2.3687820  | -1.5289620 | 1.3086840  |
| C | 2.3512040  | -1.1179150 | -0.0214340 |
| C | 1.3279730  | -0.2767480 | -0.4753980 |
| C | 1.1991870  | 0.2514900  | -1.8403880 |
| C | -0.0981370 | 1.0444820  | -2.0075270 |
| C | -0.0750760 | 2.4337670  | -2.5435590 |
| C | -1.2958950 | 3.3103260  | -2.2667050 |
| C | -1.5335030 | 3.8818630  | -1.0081810 |
| C | -2.6392020 | 4.7093420  | -0.8011000 |
| C | -3.5207950 | 4.9855020  | -1.8545530 |
| C | -3.2873810 | 4.4200660  | -3.1116200 |
| C | -2.1821270 | 3.5854250  | -3.3135830 |
| H | -0.4429210 | 0.1046520  | 2.4304190  |
| H | 1.3673720  | -1.4014270 | 3.2213770  |
| H | 3.1514880  | -2.1869090 | 1.6762140  |
| H | 3.1161020  | -1.4347060 | -0.7263360 |
| H | -1.0011140 | 0.4973430  | -2.2469250 |
| H | 0.8270090  | 2.9875100  | -2.2028950 |
| H | -0.8619490 | 3.6488500  | -0.1863750 |
| H | -2.8185040 | 5.1365390  | 0.1834510  |
| H | -4.3807640 | 5.6321030  | -1.6936510 |
| H | -3.9670180 | 4.6289890  | -3.9356370 |
| H | -1.9730020 | 3.1276260  | -4.2764250 |
| O | 0.0207930  | 1.8822540  | -3.7885570 |
| O | 2.0353680  | 0.0835690  | -2.7223640 |

O -0.5932330 0.9788570 -0.1176560

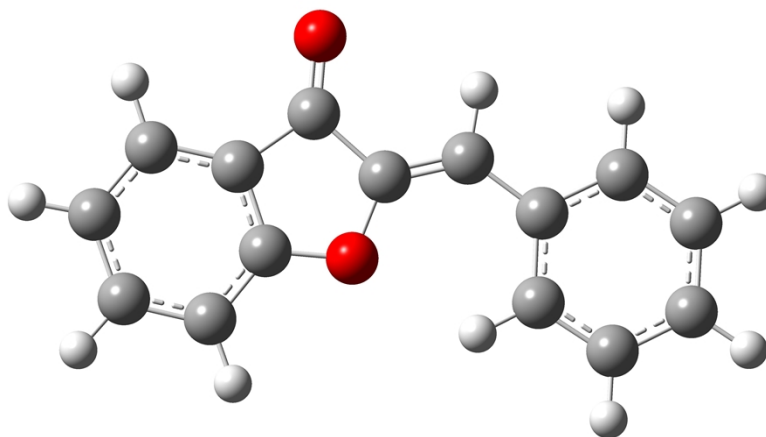

**Aurone**

| <b>Symbol</b> | <b>X</b>    | <b>Y</b>    | <b>Z</b>    |
|---------------|-------------|-------------|-------------|
| C             | -2.48145800 | 0.56868500  | -0.00028300 |
| C             | -1.91540100 | -0.70898400 | -0.00014500 |
| C             | -2.67986700 | -1.86879700 | -0.00014800 |
| C             | -4.06835300 | -1.69972600 | -0.00029900 |
| C             | -4.66213200 | -0.42360400 | -0.00044000 |
| C             | -3.87051800 | 0.72451800  | -0.00043300 |
| C             | -1.36420400 | 1.52795600  | -0.00023100 |
| H             | -2.22035000 | -2.85109400 | -0.00003900 |
| H             | -4.70436900 | -2.58016300 | -0.00030700 |
| H             | -5.74406900 | -0.33816800 | -0.00055400 |
| H             | -4.30682400 | 1.71859200  | -0.00054000 |
| O             | -0.53640700 | -0.68177000 | -0.00000800 |



|   |             |             |             |
|---|-------------|-------------|-------------|
| O | -1.38372000 | 2.75315700  | -0.00031000 |
| C | -0.14902700 | 0.65418400  | -0.00005500 |
| C | 1.12843100  | 1.08318900  | 0.00004500  |
| H | 1.20255800  | 2.16893700  | -0.00001700 |
| C | 2.38288400  | 0.34334600  | 0.00021600  |
| C | 3.58576400  | 1.08199000  | 0.00028100  |
| C | 2.46383600  | -1.06684200 | 0.00032000  |
| C | 4.82313700  | 0.44228500  | 0.00044400  |
| H | 3.53920000  | 2.16775200  | 0.00020300  |
| C | 3.70407200  | -1.70182000 | 0.00048300  |
| H | 1.55539400  | -1.65587800 | 0.00027400  |
| C | 4.88696700  | -0.95440700 | 0.00054500  |
| H | 5.73572200  | 1.03102300  | 0.00049100  |
| H | 3.74914300  | -2.78709300 | 0.00056200  |
| H | 5.84982500  | -1.45684600 | 0.00067200  |

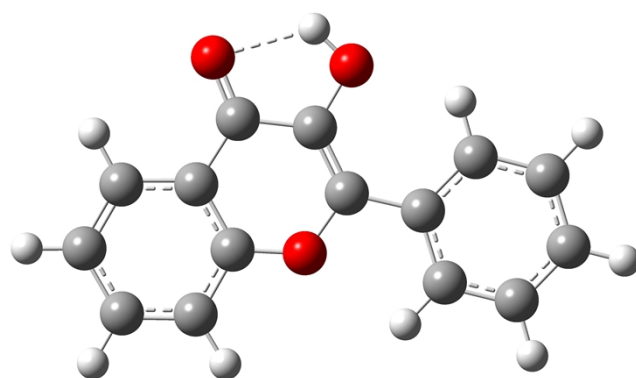

**Product**

|               |          |          |          |
|---------------|----------|----------|----------|
| <b>Symbol</b> | <b>X</b> | <b>Y</b> | <b>Z</b> |
|---------------|----------|----------|----------|

|   |             |             |             |
|---|-------------|-------------|-------------|
| C | -4.36985300 | -0.85324900 | -0.00027800 |
| C | -3.67600500 | 0.34552700  | -0.00007700 |
| C | -2.26640300 | 0.34956900  | 0.00001400  |
| C | -1.58294100 | -0.87657600 | -0.00012700 |
| C | -2.27724200 | -2.09475300 | -0.00033000 |
| C | -3.66476500 | -2.07394100 | -0.00040000 |
| H | -5.45512200 | -0.85614500 | -0.00033900 |
| H | -4.18763500 | 1.30232800  | 0.00002900  |
| C | -1.48392700 | 1.57788400  | 0.00025100  |
| H | -1.71893900 | -3.02475000 | -0.00044000 |
| H | -4.21090700 | -3.01245200 | -0.00056100 |
| C | 0.56695800  | 0.18104700  | 0.00003500  |
| C | -0.03298100 | 1.41379000  | 0.00019900  |
| C | 1.99966100  | -0.14421400 | 0.00005900  |
| C | 2.99098100  | 0.85986700  | -0.00017300 |
| C | 2.41096500  | -1.49414400 | 0.00029900  |
| C | 4.34255800  | 0.51591700  | -0.00017500 |
| H | 2.70330300  | 1.90172100  | -0.00035700 |
| C | 3.76363200  | -1.82612200 | 0.00030400  |
| H | 1.66672200  | -2.28065600 | 0.00048100  |
| C | 4.73793400  | -0.82368200 | 0.00006600  |
| H | 5.08957000  | 1.30423300  | -0.00036500 |
| H | 4.05697900  | -2.87188200 | 0.00049800  |

|   |             |             |             |
|---|-------------|-------------|-------------|
| H | 5.79220800  | -1.08441600 | 0.00006900  |
| O | 0.65536300  | 2.58107600  | 0.00041100  |
| H | -0.04699000 | 3.26860500  | 0.00061700  |
| O | -0.22425000 | -0.94361800 | -0.00011100 |
| O | -1.95201600 | 2.73097400  | 0.00012800  |
